# Supplementary material for: Immunogenomics of Hypermutated Glioblastoma: A Patient with Germline POLE Deficiency Treated with Checkpoint Blockade Immunotherapy
Source: Oxford University Press journal article supplement (doi:10.1158/2159-8290.cd-16-0575), 2016-09-28
Supplement: 21598290cd160575-sup-166719_2_supp_3679085_1dz112.xls [file 21598290cd160575-sup-166719_2_supp_3679085_1dz112.xls]

## Sheet: Primary
chrom	loc.start	loc.end	num.mark	seg.mean
1	139708	883694	109	1.76272
1	883831	12837751	7613	2.03386
1	12837802	13839430	380	1.05731
1	13839530	16817627	1571	2.03327
1	16890338	16918261	132	0.99206
1	16918301	104113278	30794	1.9546
1	104113750	106434604	147	0.997162
1	106434704	120924922	5710	1.97021
1	142824988	146674970	1559	2.32684
1	146676397	147415732	250	2.82623
1	148006124	148016336	73	1.0626
1	148016376	149858424	507	1.97349
1	149858524	151106635	1292	3.07077
1	151106850	152130411	1194	2.86712
1	152130473	152278188	126	1.79975
1	152279595	152749049	299	2.19218
1	153005279	153122768	51	1.31048
1	153274929	158424913	5840	2.87747
1	158435319	158914969	409	2.32769
1	159019410	207679462	16347	2.82072
1	207737219	208073339	242	2.29867
1	208084337	247150058	11154	2.83937
1	247200751	249212661	946	2.346
2	41554	87178578	21054	1.9767
2	87201107	88037315	138	1.19764
2	88118176	89111256	316	1.77584
2	89579165	91760773	56	2.72414
2	91760873	92151716	232	1.53986
2	92162888	92325330	92	2.42032
2	95494697	95646085	90	1.47724
2	95691558	95794604	54	2.08118
2	95815097	106870170	4628	1.85331
2	106961521	107075620	166	0.99585
2	107075695	108455455	130	1.61496
2	108455535	108608556	120	1.02009
2	108608656	109345787	285	1.81051
2	109345833	109378778	88	1.16595
2	109379678	113138477	937	1.9652
2	113138513	113181705	61	0.975829
2	113239956	129276752	3006	1.93928
2	129276852	130865755	91	1.28752
2	130897112	131221330	299	1.79129
2	131221402	131414037	65	0.808881
2	131414078	131792958	130	1.7604
2	131799411	131935356	116	2.04684
2	131935428	132120654	122	1.19408
2	132181455	132294638	225	1.64103
2	132361609	133076435	194	1.41667
2	133403635	179518090	10442	1.9565
2	179518158	179528269	52	1.13871
2	179528369	243064523	19782	1.96976
3	361517	44497140	10869	1.93146
3	44540610	44776855	145	1.31939
3	44794951	51102074	6109	2.00593
3	51102174	51399193	165	1.55283
3	51399293	75263923	6415	1.98894
3	75264023	75700229	135	1.40474
3	76483646	97806067	1094	1.89295
3	97806167	98189051	149	1.42692
3	98189107	108282173	1765	1.95912
3	108284246	108356437	52	2.51961
3	108363008	125431928	4978	1.95635
3	125443509	125696159	127	1.30785
3	125701120	185367482	14194	1.97547
3	185390267	185868096	203	2.18919
3	185877981	195505441	2098	1.95409
3	195505492	195515270	108	1.25797
3	195515389	197790664	1236	2.04503
4	47595	466264	249	1.35548
4	466306	3769789	2702	2.04995
4	3769815	4145509	101	1.4282
4	4147384	9155515	1827	1.97055
4	9157165	9385777	86	0.709414
4	9401088	9696830	64	1.39271
4	9696897	9735226	54	1.10451
4	9737572	69344599	7939	1.96347
4	69344699	70257438	262	1.50131
4	70257509	70352320	67	1.14013
4	70504984	77996838	2344	1.93118
4	78669502	78987270	59	2.29485
4	79102603	104007497	4859	1.92172
4	104007597	104116324	155	2.4353
4	104116424	155484303	8169	1.93209
4	155486950	155511805	70	1.511
4	155511905	191044258	4952	1.92731
5	140421	140085429	24965	1.98082
5	140166332	140777835	1299	1.81497
5	140778135	175388472	8256	1.95889
5	175392182	175740593	90	1.39465
5	175740693	177054618	1449	2.05804
5	177058377	177399117	92	1.42553
5	177483240	178050493	293	2.01587
5	178288126	178507183	210	1.49402
5	178509700	180710524	1349	1.99336
6	292455	27279990	5441	1.98643
6	27420490	29556040	878	1.63346
6	29556120	29603930	90	2.36674
6	29603999	29944742	199	1.63762
6	30029254	123539985	25238	1.96103
6	123588903	123823827	97	2.29867
6	123849817	170893783	10456	1.9589
7	31041	6694305	3084	2.07407
7	6730556	6979518	238	1.46084
7	7222439	56174158	9704	1.94459
7	56183611	57529737	575	1.17767
7	62547301	66743354	1504	1.49817
7	66751066	76145849	2502	1.86865
7	76145928	76739470	118	1.11152
7	76742760	99297746	5352	1.96452
7	99303081	99381790	113	1.29531
7	99425757	99869736	754	2.00097
7	99869770	99930355	76	1.15429
7	99933535	100637979	1300	1.96837
7	100638038	100645594	79	0.911238
7	100645663	102119373	997	1.95236
7	102136541	102282331	91	1.46927
7	102311945	143269099	10304	1.938
7	143295278	144344320	360	1.43417
7	144345890	159025843	4100	1.98163
8	357354	2092925	466	2.07657
8	2093014	3611618	252	1.70704
8	6264161	6794540	211	1.94704
8	6873520	7191650	65	1.34304
8	7194567	7220693	54	0.88632
8	7230781	8099002	180	1.29605
8	8647982	11842208	696	1.93512
8	11851397	12554762	231	1.3531
8	12561159	13162890	194	1.95979
8	13251019	16043816	182	1.72584
8	16341416	22880499	2219	2.05937
8	22880599	23145772	166	1.76247
8	23146028	23425942	193	2.17392
8	23426014	25261345	523	1.75832
8	25265491	25716084	130	2.03172
8	25897655	26513321	158	2.30378
8	26613914	31498123	1706	2.00554
8	31498223	37268439	430	1.67285
8	37416828	43054769	2307	1.99391
8	43106892	43367843	62	1.66913
8	48273637	49105765	453	2.11433
8	49105846	55060328	601	1.96409
8	55104454	57390516	521	1.73255
8	57390582	61471551	307	1.93482
8	61484685	61778491	177	2.34096
8	61778580	62492259	94	1.73857
8	62496516	62602475	101	2.30729
8	62602526	110416996	7431	1.95896
8	110417028	110534658	227	1.67481
8	110534970	141407628	4083	1.92568
8	141407728	142146914	233	2.23938
8	142147014	143570005	545	1.89527
8	143570433	143694749	65	2.4996
8	143694849	143857465	203	1.93402
8	143857505	144240164	140	1.64103
8	144240264	144873734	758	2.01252
8	144873887	144922524	179	2.35202
8	144940552	144946877	65	1.86516
8	144990346	145095952	316	2.11873
8	145096052	145114493	115	1.76284
8	145114593	145230066	136	2.14712
8	145230155	145515428	62	1.69949
8	145515528	146067241	981	2.11975
8	146067341	146172457	92	1.63252
9	14640	271809	148	1.44003
9	272980	21141518	3576	1.9461
9	21141618	21696196	137	1.23755
9	21802755	28150736	632	2.00194
9	28150836	32333520	52	1.23379
9	32333553	38596458	3989	1.9564
9	38601079	39150079	105	1.37812
9	39361043	70972134	906	1.24067
9	70972234	71224628	60	1.66036
9	71299140	84531628	2398	1.95071
9	84531728	85047987	195	1.28556
9	85048087	90388069	1259	2.00011
9	90474165	90503786	56	1.67064
9	90503865	90796096	128	1.16439
9	90856834	95572244	1089	1.97479
9	95644806	95738720	62	1.21833
9	95738820	107361214	3406	1.93607
9	107361314	107510234	61	1.27863
9	107513259	135896020	11925	1.99166
9	135932127	135946323	56	1.64217
9	135974086	136063131	113	2.1311
9	136063215	136123292	67	1.45005
9	136131016	141111473	4950	2.05623
10	93097	3827278	705	2.02533
10	5008092	5260841	165	1.29702
10	5324858	30655394	5755	2.00031
10	30657189	30998481	128	1.79689
10	31067778	35930412	878	2.1136
10	35930490	39076214	384	1.49181
10	39076283	42600246	171	2.94343
10	42600346	43279788	166	1.41421
10	43279888	46159232	677	1.91633
10	46173169	46914553	269	1.16078
10	46914653	47707382	238	1.69267
10	47708581	48033229	94	1.3765
10	48370602	48438768	98	1.75382
10	48901718	49383296	167	1.20472
10	49383977	51130706	957	1.7048
10	51130806	51465767	59	1.05132
10	51556779	51732900	86	1.9168
10	51741914	52002967	227	1.14838
10	52003067	75423613	5152	1.93982
10	75434216	75463919	88	1.27368
10	75493123	81272471	1505	2.06332
10	81272571	81838425	173	1.38002
10	81838506	88759443	997	1.89948
10	88760030	88811455	77	1.36216
10	88811543	88973048	110	1.95315
10	88973148	89136792	93	1.32006
10	89148714	96493165	2361	1.99134
10	96493265	96827558	130	1.42021
10	96828385	111967534	6377	1.96947
10	111967593	112327702	85	2.36395
10	112335042	124330575	3476	1.98412
10	124331758	124381047	127	1.06245
10	124384143	135367887	3236	1.95347
10	135367941	135491165	68	1.40649
11	86956	200173	72	1.4568
11	205293	18210780	9962	1.90659
11	18218694	18291632	69	1.3905
11	18301464	48328441	6531	1.98602
11	48328541	56569440	1352	1.37193
11	56569491	58477343	1023	1.91959
11	58477443	58766023	62	1.45781
11	58877124	58980419	114	2.12682
11	59132252	59283248	84	1.63014
11	59344232	59417191	75	2.21606
11	59419875	60971191	917	1.85703
11	61017217	67431290	8555	2.08406
11	67431320	67790066	222	1.53933
11	67790166	71212453	1319	2.09058
11	71238218	71513364	150	1.49174
11	71615112	89378309	4757	1.97633
11	89378409	89487162	105	1.45015
11	89487234	89820116	188	1.07572
11	89867938	123880615	9778	1.9673
11	123886268	124487109	301	1.53879
11	124487209	133309409	2603	1.93021
11	133714568	134886602	505	2.15129
12	73777	7656370	4448	2.0015
12	7802134	11420787	1938	1.78167
12	11420887	11547089	64	1.32436
12	11547415	22208290	2240	1.94611
12	22211755	24102468	227	2.1628
12	24737452	43955056	3764	1.8753
12	44124290	44200112	104	2.07671
12	44238447	45825759	257	1.77347
12	46124026	52841408	4750	1.98787
12	52841442	52886776	118	1.35266
12	52886848	133257972	26868	1.97367
12	133266891	133477018	275	2.20962
12	133501951	133811099	152	1.46145
13	19044075	19997200	247	1.35695
13	20207853	24463542	1143	2.02343
13	24734936	24864985	66	2.24965
13	24865085	44058388	4867	1.97541
13	44455117	53422670	2452	1.45392
13	53422745	59199935	135	1.2223
13	60240713	60566732	61	1.5914
13	61068557	72053581	228	1.32711
13	72063117	79191313	1134	1.5079
13	79216330	88330582	239	2.0734
13	92100982	95095796	89	1.70102
13	95095896	106142123	2259	1.98182
13	106142223	108518110	87	2.30761
13	108518210	109780033	174	2.01391
13	109792551	110807698	77	2.4321
13	110807798	115091885	1971	2.03411
14	19028490	20345377	311	1.21888
14	20388772	20920267	493	1.8124
14	20920367	20937767	52	2.44477
14	20937811	21490243	267	1.83083
14	21490343	21571572	224	2.28992
14	21623112	21993224	512	1.97657
14	22033678	23192777	104	1.65542
14	23235754	23512423	439	2.1038
14	23517164	23564602	161	2.40511
14	23566860	23855310	354	1.98577
14	23855390	23898380	247	1.60949
14	23898480	24423257	353	2.03679
14	24424116	24518397	98	1.43594
14	24518497	24911693	1376	2.0148
14	24911752	26918255	141	1.74086
14	27067251	31204860	193	2.28865
14	31296211	38220405	1611	1.95423
14	38220478	39502593	114	1.6181
14	39508287	45716569	768	2.04491
14	45759254	50044704	122	1.7213
14	50050343	50578664	359	2.10497
14	50578764	50623930	53	2.57558
14	50623968	57947077	2052	2.06815
14	57947259	58606050	101	1.73712
14	58606150	60619719	653	2.06508
14	60619819	61116033	150	2.39678
14	61262928	70527669	3030	2.00965
14	70530588	70991726	138	1.64255
14	71051523	73975047	953	2.04759
14	73975098	74083862	96	1.56406
14	74083962	77606113	1966	2.00402
14	77606198	77737445	115	1.66624
14	77743787	82382975	997	1.97479
14	84638589	88419104	60	2.20045
14	88429721	90783033	783	1.97247
14	90783133	91124751	88	2.4536
14	91124818	93814482	1185	2.02399
14	93814525	94087913	124	1.68599
14	94088013	94733375	332	2.12638
14	94741670	99439914	1030	1.9616
14	99640540	100070157	143	2.46759
14	100150733	105408087	2875	2.02853
14	105408187	105419749	106	1.46175
14	105419849	105684291	244	1.92532
14	105685338	105996217	361	2.23938
14	105996279	106478627	69	1.64878
15	20444975	20832943	155	0.921813
15	20867281	22705327	293	1.25747
15	22782323	23098485	246	1.99322
15	23157358	23293761	131	1.11257
15	23299688	23377524	51	1.83071
15	23388382	23684928	191	1.09885
15	23684993	28927321	1014	1.89857
15	28947006	28991228	105	1.18444
15	28999662	30337666	339	2.00264
15	30374757	30437971	102	1.07497
15	30517783	30898320	142	1.40318
15	30903688	75541813	19165	1.94737
15	75544719	75614375	81	1.08245
15	75614686	84842991	3785	1.92112
15	84843038	85105261	140	1.24824
15	85112745	85681161	422	1.97178
15	85681226	85808339	76	1.20907
15	85813417	102316509	4218	2.00187
15	102316604	102516553	97	1.30324
16	66987	12021272	8491	2.046
16	12021372	12036183	56	0.979081
16	12059148	14766716	440	2.03411
16	14863811	15032254	219	1.44834
16	15068568	15188174	183	2.05851
16	15201650	15456593	116	1.64251
16	15475233	15982554	354	1.99308
16	16043588	21847426	2711	1.75538
16	21847492	21901501	59	0.932839
16	21903043	28332342	2295	1.93886
16	28353928	28468479	58	1.10435
16	28488900	29376443	844	1.81193
16	29392644	29412060	74	1.01565
16	29412160	29493948	51	1.60303
16	29576718	30206145	795	2.13672
16	30206200	30347618	55	1.12016
16	30347718	31579918	2018	2.07556
16	31579986	35037405	671	1.27647
16	35232648	54967842	2270	2.04122
16	55010902	55989904	336	1.76786
16	56225671	69973890	6552	1.99585
16	69973938	70030497	108	1.31923
16	70044622	71418802	1174	1.90316
16	71418843	71509998	50	1.36822
16	71510098	73580759	957	1.95288
16	74371631	74419421	75	1.40834
16	74421914	74455031	123	1.04768
16	74455130	90173258	5646	1.9888
17	5949	2929450	2009	2.06609
17	2929477	3337264	161	1.52425
17	3343481	4994907	2261	1.96755
17	4995007	5087322	221	1.40104
17	5087422	7734189	2812	2.05762
17	7735051	7769916	132	2.42032
17	7797728	16395438	4132	1.83908
17	16456550	16856061	339	1.55401
17	16875339	18259360	1298	2.12516
17	18346053	18675718	227	1.54404
17	18741459	20305471	894	2.0202
17	20319891	20420677	99	1.38003
17	20459561	21904960	439	1.72752
17	21906303	25309324	59	2.33351
17	25601338	25639460	51	2.12447
17	25958362	26097957	132	1.48586
17	26098057	28881075	2382	2.04421
17	28881151	28960196	78	1.4711
17	28960296	34397941	2417	1.90814
17	34397985	34500278	64	0.988971
17	34842576	36243629	813	1.94895
17	36286874	36365306	74	1.06083
17	36367361	39186401	2778	2.01321
17	39186457	39394738	238	1.16506
17	39502344	39578930	142	1.45953
17	39579030	45056472	5583	1.96657
17	45056558	45150592	63	1.4149
17	45198344	49711034	3223	2.0047
17	49711120	52030845	87	1.57222
17	52982845	58079814	2130	1.96616
17	58079857	58094765	77	0.944813
17	58094808	58258060	148	1.95775
17	58258120	58289575	67	1.38175
17	58291955	60142706	651	1.98591
17	60214393	60342355	57	1.6218
17	60342432	60366270	83	1.05651
17	60483843	61920138	1105	1.99463
17	61949422	61995683	99	1.41549
17	61995783	62487795	383	1.89961
17	62488876	62512896	83	2.53643
17	62512996	62930244	315	1.79676
17	62964499	66042763	903	2.19573
17	66202270	81194992	9787	2.02979
18	118417	5543909	1201	1.99529
18	5544009	7023466	373	1.66763
18	7024397	10605192	724	1.95511
18	10605292	11568103	214	1.71832
18	11609521	11689556	122	1.08598
18	11689656	13919973	902	2.03017
18	13975691	14513926	165	1.42781
18	14522141	14752763	78	1.10107
18	14851617	15272510	75	1.39513
18	18520236	19110396	87	2.27821
18	19112367	23915277	1279	1.94003
18	23937678	25758066	174	2.16186
18	27367351	29470619	623	1.79514
18	30267135	31318636	108	2.30857
18	31318736	32825351	319	1.90132
18	32825451	32917623	69	1.40415
18	32917723	33422135	114	1.90501
18	33545136	33725049	114	2.27143
18	33725083	41902000	563	1.92273
18	42281322	42642964	64	2.27505
18	43204595	47800563	1567	1.92805
18	47800663	47917691	96	2.42368
18	47917767	57364013	1536	1.98733
18	57364399	59203824	113	1.50295
18	59203924	61231230	555	2.01545
18	61231330	65042544	337	1.75583
18	65178209	75031826	1171	2.01364
18	75031895	76671774	58	1.22833
18	76707299	78005277	451	2.2058
19	281356	7810067	8534	2.09552
19	7811326	11796661	4956	1.88925
19	11832523	12708041	938	1.4586
19	12754103	19790634	7954	2.04812
19	19790734	22551632	1466	1.46978
19	22575397	24364244	782	1.37751
19	27814409	34991205	1505	1.97069
19	35084484	35263910	119	1.47662
19	35448847	36643411	1946	1.97178
19	36673298	38313450	991	1.44683
19	38314487	40366688	2427	1.99681
19	40367175	40411687	147	1.14528
19	40411787	40512157	97	1.9058
19	40513135	40542472	77	1.30649
19	40697992	43166072	2951	1.90832
19	43174526	43965592	538	1.21134
19	43965692	49523356	6050	2.0375
19	49526065	49558282	124	1.22706
19	49558359	51714560	3170	2.01112
19	51728390	52664021	831	1.65634
19	52780948	54081067	1422	1.38463
19	54081144	54724026	632	2.11374
19	54724126	54867839	287	1.35388
19	54867939	55009510	184	2.09101
19	55014077	55378284	424	1.28254
19	55385735	56283255	1544	2.02933
19	56284065	58806965	2444	1.65169
19	58846113	59068597	426	2.04514
20	68344	1447570	635	1.91428
20	1456770	2082569	176	1.60158
20	2082669	2306629	56	2.04982
20	2306711	2413440	85	1.5803
20	2442411	3762109	1296	1.96169
20	3765319	4004921	172	2.31691
20	4005021	6031649	543	2.00611
20	6031721	9319814	272	1.744
20	9343597	10603760	297	1.97863
20	10603860	10654259	87	2.47684
20	10654326	23618633	2115	1.92759
20	23666497	23967451	66	1.4063
20	24952150	25038747	77	2.28723
20	25176469	25204848	55	1.96061
20	25205794	25281139	71	2.50411
20	25281239	25520785	191	1.98687
20	25529604	30053261	184	1.65065
20	30053361	35835694	4058	1.95538
20	35835794	36468630	153	2.30681
20	36468686	44098610	2607	1.92979
20	44098956	44420622	186	1.63048
20	44420722	55070413	3207	2.03708
20	55070450	55205721	61	1.60481
20	55205775	57617889	775	2.20947
20	57688441	58416701	150	1.81378
20	58420324	58544113	129	2.44596
20	58545082	60174836	100	1.6629
20	60174936	60982261	675	2.12564
20	60985970	61150997	86	1.79365
20	61162197	61588264	467	2.28137
20	61588364	61638357	54	1.68249
20	61680400	62905023	1484	2.07496
21	9590268	14439257	295	1.32207
21	14468251	14751939	57	1.10366
21	15011870	15441544	91	1.50014
21	15481312	30927673	1216	1.97263
21	30927757	32492650	288	1.63037
21	32492750	45953880	5435	2.05341
21	45959062	46193363	213	1.43028
21	46193463	48084345	1554	2.06094
22	16255333	16957731	197	1.05792
22	17038547	17443697	130	1.50316
22	17443797	18310321	457	2.04401
22	18310421	18368860	96	2.40994
22	18368935	18568065	67	2.12786
22	18568154	18656077	65	1.71761
22	18762654	18844726	70	1.0826
22	18893816	19036238	99	1.73231
22	19044501	20024605	904	2.01461
22	20067935	20119617	151	2.38502
22	20119676	20296951	133	1.95789
22	20367195	20456824	53	1.66002
22	20456876	20640461	90	1.16022
22	20644315	20731670	143	1.70858
22	20748889	21557340	721	2.02365
22	21579172	21922281	108	1.67087
22	21922381	22330190	312	2.0174
22	22330255	23437834	211	1.68459
22	23437934	23603824	91	2.38023
22	23606351	23657764	62	2.08089
22	23738904	24000050	99	1.67052
22	24034597	25011172	820	2.01015
22	25016249	25243478	159	1.68681
22	25243543	25734104	189	1.95247
22	25735826	26057700	57	1.4147
22	26059662	29542664	1020	2.03073
22	29542764	29695117	164	1.72548
22	29695217	29805624	147	2.29072
22	29815204	30204032	325	1.82134
22	30204132	30845080	416	2.13465
22	30845180	30940104	153	1.67145
22	30942623	32352894	1222	2.04429
22	32435508	32784164	203	1.62079
22	32788233	36694932	784	1.99764
22	36695032	36718654	65	2.57916
22	36722627	37098677	149	2.1057
22	37154387	37268484	55	2.37084
22	37271699	37398191	86	1.69807
22	37458781	51216538	8305	2.05055
X	200835	442613	101	2.34909
X	544743	12940368	1563	1.99995
X	13056596	14262606	226	2.4257
X	14548161	26766786	2218	2.08945
X	27766354	37402088	764	1.8264
X	37518788	47028784	1287	2.08715
X	47038480	47240659	222	2.45428
X	47269658	47326985	55	1.48185
X	47372034	47486207	118	2.16565
X	47636581	47917883	84	1.58634
X	48123527	48297930	83	1.18222
X	48299920	49161497	1026	2.11528
X	49161543	49368584	89	0.966204
X	49369696	100750514	6648	1.93721
X	100807951	100912626	54	2.39313
X	101033864	101429482	128	1.71297
X	101439860	135730640	5511	1.98951
X	135736582	135954550	76	2.2107
X	135956450	148568703	723	1.81114
X	148731005	153416366	1742	2.09872
X	153524241	153671096	313	2.36461
X	153674018	155255165	724	2.03045
Y	2655031	2847986	62	1.92839
Y	2848086	5605900	118	1.40513
Y	6595462	7172159	62	1.84523
Y	7194095	9175160	135	1.15173
Y	9175232	9385760	75	0.777816
Y	9385860	14821558	189	1.32966
Y	14832567	23548221	471	1.94652
Y	23557074	28780826	172	1.00146

## Sheet: C7-T2_Met
chrom	loc.start	loc.end	num.mark	seg.mean
1	14633	145313447	46329	1.91054
1	145322932	172222891	15776	2.746
1	172277894	172557471	209	3.01175
1	172557950	198553563	5870	2.79734
1	198663657	200635934	295	3.02723
1	200708877	249212661	16690	2.78154
2	41567	243064523	61982	1.95719
3	361517	197942302	49177	1.95354
4	47595	9213290	4774	1.87952
4	9218158	9385617	71	1.26339
4	9385717	155489018	23934	1.96267
4	155490318	191044258	4709	1.95724
5	140421	180710524	37378	1.94547
6	292455	33272510	11252	1.92007
6	33272809	33403131	205	2.12211
6	33405423	123539985	19722	1.94556
6	123588903	123818459	88	2.45275
6	123849817	170949447	10456	1.94982
7	20851	77100086	17814	1.90769
7	77212921	159025843	22932	1.9421
8	116212	8097713	1233	1.82127
8	8097812	8887409	146	2.07311
8	9432521	110257632	17908	1.94531
8	110257732	110418764	89	2.20488
8	110420311	144623420	5610	1.91068
8	144650309	144658876	57	2.26608
8	144658976	146231332	2285	1.93456
9	14653	38578239	8293	1.92966
9	38595658	69420653	993	1.662
9	69423402	141111473	25426	1.90233
10	93097	51751683	11203	1.89675
10	51754396	135491165	23680	1.9192
11	86956	134886602	47081	1.92079
12	73777	6959822	3459	1.8908
12	6964521	133811099	40857	1.9357
13	19041863	19997245	270	1.72111
13	20224496	21966106	632	1.9004
13	21974541	22202859	63	2.24451
13	22202959	36420243	3361	1.93898
13	36420343	36445498	59	2.48372
13	36521507	44184086	1713	1.96445
13	45112649	79219217	3952	1.07411
13	81230094	96508637	594	1.92382
13	96543180	96665547	56	2.39878
13	96665647	115091885	3811	1.90895
14	19028490	23396818	2235	1.8973
14	23415728	107281301	23166	1.93963
15	20359046	102513976	29741	1.88113
16	67336	30212095	16441	1.88089
16	30346345	31470073	1769	1.98779
16	31473392	49889100	1921	1.8258
16	50187677	90173258	15513	1.91274
17	5997	81194993	48123	1.89037
18	47505	30563350	5924	1.89878
18	30672826	31225005	50	2.44596
18	31226243	43675235	1551	1.90609
18	43677797	44013172	78	2.20962
18	44013272	51715464	1364	1.87882
18	51729133	51933521	140	2.14593
18	52258425	74726290	3084	1.92002
18	75031895	76671774	56	1.68681
18	76707299	78005277	440	1.93796
19	110633	59084038	51822	1.86509
20	68344	36954910	10260	1.8868
20	36955987	43961772	2037	1.82673
20	43964409	44050215	126	2.11169
20	44171447	44519448	341	1.85685
20	44533463	44576052	70	2.12402
20	44576152	58416701	3680	1.91185
20	58420324	58461867	52	2.5088
20	58467055	58514729	52	2.14384
20	58514829	60869123	455	1.88984
20	60878656	60891878	95	2.14384
20	60891978	62959504	2287	1.93194
21	9825970	14752073	328	1.68927
21	14800088	15281998	70	1.48875
21	15310052	38545170	3918	1.93405
21	38559395	46957987	3330	1.85829
21	47270004	47404473	60	2.08103
21	47406431	48079756	936	1.80114
22	16256133	16350358	52	1.59416
22	16352106	20339568	2364	1.85571
22	20379732	51216553	15547	1.84844
X	200835	2692896	464	1.52213
X	2700166	13767628	1348	1.94302
X	13770876	57337150	7884	1.94046
X	57420838	154437329	13636	1.96242
X	154464570	155254088	162	1.60804
Y	2655031	9159984	388	1.10789
Y	9162329	9368131	70	0.862442
Y	9368231	9906579	50	1.07691
Y	13329412	13869180	61	1.53826
Y	14077921	23631223	508	1.11544
Y	23631426	25313229	66	0.909156

## Sheet: T7-8_Met
chrom	loc.start	loc.end	num.mark	seg.mean
1	14644	79215833	34395	1.96343
1	79357217	81969236	92	1.53475
1	82302732	104113278	4657	1.94682
1	104114124	104297432	118	1.73171
1	104615610	146500778	7166	2.05225
1	146595799	149647235	839	2.25428
1	149648029	152188169	2530	2.63579
1	152188710	153191509	538	2.40494
1	153233446	157670633	5244	2.58636
1	157679459	159924039	1203	2.44326
1	159943019	162830900	2156	2.20581
1	163038786	186418666	7059	2.11177
1	186571565	192628687	210	1.92431
1	192963579	193075297	121	2.3256
1	193091340	247171334	16710	2.1213
1	247263675	247363648	84	1.725
1	247419404	247921834	225	2.15786
1	248039188	248814243	401	1.92226
1	248902865	249212661	122	2.29342
2	41567	79386680	18563	2.01681
2	79878698	110373840	8211	1.96014
2	110518141	111725513	227	1.752
2	111744700	131793594	4061	1.97818
2	131796382	134060780	826	1.77744
2	135011922	243064523	29375	2.00372
3	361517	44323579	10449	1.98619
3	44332296	44636851	240	1.72178
3	44751316	75786217	12547	2.02834
3	75788159	197942302	25034	1.9706
4	47595	683027	474	1.67597
4	727456	8952295	4220	1.97954
4	8963495	69362595	7976	1.91981
4	69382659	70221184	370	1.60256
4	70223725	191044223	20460	1.91168
5	140421	1882893	1246	2.00249
5	2747701	2888339	56	1.76712
5	5140485	17276088	2001	2.00156
5	17354419	32040032	571	1.79348
5	32040997	177734016	31170	1.97913
5	177945991	178951697	399	1.67274
5	178977534	180710524	1198	1.97479
6	292455	27326216	5258	1.97142
6	27368134	27491906	57	1.34034
6	27704800	30437082	1336	1.81144
6	30454103	170949447	34627	1.98584
7	20851	6694383	2994	2.02915
7	6730456	6761831	61	1.48113
7	6771586	6979518	172	1.68424
7	7222439	50800125	8554	1.97017
7	51085205	56535484	940	1.77569
7	56753782	63982947	830	1.45024
7	63986725	65228411	356	1.72817
7	65338243	65558035	106	2.02385
7	65579747	67277633	430	1.75878
7	68838364	91509478	4822	1.97092
7	91570455	91652381	54	2.39579
7	91657055	159025843	20499	1.9921
8	116212	43054769	10150	1.97643
8	43126654	48042042	148	1.63376
8	48069134	74538338	4055	1.96025
8	74585314	74791245	119	2.18616
8	74858925	144512638	10685	1.95871
8	144520196	145831106	2179	2.13329
8	145948293	146171688	242	1.78608
9	14653	44789661	8729	1.94598
9	44867526	68728945	303	1.60117
9	69112825	69448357	114	2.0068
9	69485876	71628999	286	1.74146
9	71650668	84303253	2216	1.96151
9	84603667	84701645	120	1.65256
9	84703515	141111473	22678	1.99635
10	225988	72149270	14371	1.93523
10	72149650	135491165	19885	2.14514
11	86956	48374201	16158	1.96934
11	48997061	49230037	217	1.7431
11	49329436	50129675	163	1.49952
11	51527708	56511407	680	1.74647
11	56949389	58059925	818	2.00835
11	58125613	58723602	206	1.80288
11	58765965	58980419	113	2.00847
11	59055926	59283390	97	1.73929
11	59344032	124016742	25412	1.97988
11	124078129	134643567	3068	1.96894
12	73777	133732568	44170	1.97617
13	19041863	19879685	211	1.49351
13	19918802	20077519	114	1.72776
13	20207878	61147929	8686	1.94019
13	61985418	71158435	213	1.62068
13	72249513	115057356	5901	1.96382
14	19028490	19833593	182	1.66601
14	20137171	20782010	283	1.99917
14	20783969	106139502	24823	2.13053
15	20446257	22538631	468	1.49278
15	22691023	102516610	29565	1.96433
16	66557	32096718	18620	2.01883
16	32264793	47581521	1044	1.73409
16	47600315	51185242	1126	2.03723
16	51383749	85205509	12393	2.00031
16	85391067	85722597	122	2.20045
16	85741630	90133377	2505	2.04691
16	90141361	90244378	84	1.56103
17	5997	5015250	4350	2.0329
17	5033676	6733792	926	1.9272
17	6899389	15562282	5572	2.03927
17	15580481	16831219	831	1.79807
17	16842838	20305471	2496	2.04412
17	20327893	20516262	147	1.65027
17	20602079	62930282	23479	1.9885
17	62949822	63052821	54	1.72548
17	63133641	81194993	10268	2.09331
18	84079	14868105	3628	1.91866
18	15004445	15272690	54	1.54221
18	18511186	57364738	6740	1.95319
18	57567380	58039672	70	1.70421
18	59157775	78005293	2570	1.95981
19	110633	549878	295	1.9583
19	572347	8890456	9064	2.03394
19	8922883	10159407	1468	1.72753
19	10197071	11633313	2173	2.02575
19	11649750	11849809	168	1.61956
19	11915218	12670515	758	1.44863
19	12670994	14831543	2289	2.03411
19	14842026	15027485	177	1.70067
19	15038447	19791176	5285	2.0081
19	19905057	30106390	1873	1.70555
19	30156468	34991336	1323	1.96621
19	35169695	35263937	95	1.49205
19	35326680	36693047	1992	2.00697
19	36727242	38161172	825	1.44044
19	38184409	43064743	5596	1.97145
19	43065920	44976505	1627	1.70267
19	44981710	52328175	8555	1.99107
19	52375792	53995477	1592	1.51594
19	54072618	56758367	3444	1.93277
19	56895177	56953620	76	1.57986
19	56969528	58773055	1746	1.73634
19	58846113	59084038	456	1.99945
20	68344	26084439	6098	1.96322
20	26114649	29847535	60	1.72788
20	29873120	62959504	13784	2.01289
21	9416204	10620880	74	1.39436
21	10623249	11098923	147	1.85542
21	15281926	15441544	69	1.52014
21	15481312	48084345	7761	2.00066
22	16122819	16449942	133	1.59582
22	16650589	23657764	3974	1.97814
22	23738904	23991504	93	1.71356
22	24034197	25735948	1126	1.96742
22	25747609	26118512	95	1.67284
22	26157044	51216553	12672	2.00088
X	200835	47518441	6507	1.96591
X	47662751	48159288	204	1.5175
X	48163766	155255171	16964	1.95677
Y	2655031	7172059	218	1.8564
Y	7937633	9149793	59	1.20139
Y	9159787	9325482	57	1.96578
Y	9385713	14834158	198	1.44715
Y	14837105	21906473	409	1.89054
Y	24457560	59024663	121	1.28645
